# Supplementary material
Source: PubMed Central journal article supplement (PMC4839412)
Supplement: pnas.1521582113.sd01.pdf [file pnas.1521582113.sd01.pdf]

**Supplementary Dataset S1. Human Virus Data Set.** The 203 human viruses used here, including their taxonomic classification, genome type and segmentation, as well as descriptive features of each virus. Viruses that have been reported in less than ten cases are marked with double asterisk.

| Species                               | Family           | Genus             | Baltimore Category | Transmission Mode                               | Genome Length (nt) | Genome Type | Duration of Infection | Mortality Rate (%) | Envelope Status | Segmentation  | Recombination Frequency | Human-To-Human | Citation |
|---------------------------------------|------------------|-------------------|--------------------|-------------------------------------------------|--------------------|-------------|-----------------------|--------------------|-----------------|---------------|-------------------------|----------------|----------|
| Adeno-associated virus                | Parvoviridae     | Dependoparvovirus | Two                | fecal-oral; respiratory                         | 4679               | DNA         | chronic               | 0.00%              | non-enveloped   | non-segmented | high                    | yes            | (1)      |
| Aichi virus                           | Picornaviridae   | Kobuvirus         | Four               | fecal-oral                                      | 8251               | RNA         | acute                 | 0.00%              | non-enveloped   | non-segmented | high                    | yes            |          |
| Anajatuba virus                       | Bunyaviridae     | Hantavirus        | Five               | direct/indirect contact                         | 12000              | RNA         | acute                 | 0.00%              | enveloped       | segmented     | high                    | no             |          |
| Andes virus                           | Bunyaviridae     | Hantavirus        | Five               | direct/indirect contact                         | 12104              | RNA         | acute                 | 30.00%             | enveloped       | segmented     | high                    | yes            |          |
| Araraquara virus                      | Bunyaviridae     | Hantavirus        | Five               | direct/indirect contact                         | 12000              | RNA         | acute                 | 37.00%             | enveloped       | segmented     | high                    | no             | (2)      |
| Australian bat lyssavirus**           | Rhabdoviridae    | Lyssavirus        | Five               | animal bite                                     | 11822              | RNA         | acute                 | 100.00%            | enveloped       | non-segmented | low                     | no             | (3)      |
| Bagaza virus**                        | Flaviviridae     | Flavivirus        | Four               | vector                                          | 10284              | RNA         | acute                 | 0.00%              | enveloped       | non-segmented | low                     | no             | (4)      |
| Banna virus                           | Reoviridae       | Seadornavirus     | Three              | vector                                          | 21000              | RNA         | acute                 | 0.00%              | non-enveloped   | segmented     | high                    | no             |          |
| Barmah forest virus                   | Togaviridae      | Alphavirus        | Four               | vector                                          | 11488              | RNA         | acute                 | 0.00%              | enveloped       | non-segmented | high                    | no             |          |
| Bas-Congo virus**                     | Rhabdoviridae    | Unassigned        | Five               | unknown                                         | 11892              | RNA         | acute                 | 67.00%             | enveloped       | non-segmented | low                     | yes            | (5)      |
| Bayou virus**                         | Bunyaviridae     | Hantavirus        | Five               | direct/indirect contact                         | 13175              | RNA         | acute                 | 1.00%              | enveloped       | segmented     | high                    | no             |          |
| Bhanja virus                          | Bunyaviridae     | Phlebovirus       | Five               | vector                                          | 11511              | RNA         | acute                 | 0.00%              | enveloped       | segmented     | high                    | no             |          |
| BK polyomavirus                       | Polyomaviridae   | Polyomavirus      | One                | bodily fluids                                   | 5130               | DNA         | chronic               | 0.00%              | non-enveloped   | non-segmented | high                    | yes            |          |
| Black creek canal virus**             | Bunyaviridae     | Hantavirus        | Five               | direct/indirect contact; respiratory fecal-oral | 12000              | RNA         | acute                 | 0.00%              | enveloped       | segmented     | high                    | no             |          |
| Bufavirus**                           | Parvoviridae     | Protoparvovirus   | Two                | fecal-oral                                      | 5200               | DNA         | acute                 | 0.00%              | non-enveloped   | non-segmented | high                    | yes            |          |
| Bundibugyo ebolavirus                 | Filoviridae      | Ebolavirus        | Five               | bodily fluids                                   | 18941              | RNA         | acute                 | 34.00%             | enveloped       | non-segmented | low                     | yes            |          |
| Bunyamwera virus                      | Bunyaviridae     | Orthobunyavirus   | Five               | vector                                          | 12294              | RNA         | acute                 | 30.00%             | enveloped       | segmented     | high                    | no             |          |
| Bunyavirus La Crosse                  | Bunyaviridae     | Orthobunyavirus   | Five               | vector                                          | 12491              | RNA         | acute                 | 1.00%              | enveloped       | segmented     | high                    | no             |          |
| Bunyavirus snowshoe hare              | Bunyaviridae     | Orthobunyavirus   | Five               | vector                                          | 12208              | RNA         | acute                 | 20.00%             | enveloped       | segmented     | high                    | no             |          |
| Bwamba virus                          | Bunyaviridae     | Orthobunyavirus   | Five               | vector                                          | 12582              | RNA         | acute                 | 0.00%              | enveloped       | segmented     | high                    | no             |          |
| California encephalitis virus         | Bunyaviridae     | Orthobunyavirus   | Five               | vector                                          | 12491              | RNA         | acute                 | 0.10%              | enveloped       | segmented     | high                    | no             |          |
| Candiru virus                         | Bunyaviridae     | Phlebovirus       | Five               | vector                                          | 12495              | RNA         | acute                 | 0.00%              | enveloped       | segmented     | high                    | no             |          |
| Caraparú virus**                      | Bunyaviridae     | Orthobunyavirus   | Five               | vector                                          | 12259              | RNA         | acute                 | 0.00%              | enveloped       | segmented     | high                    | no             |          |
| Chandipura virus                      | Rhabdoviridae    | Vesiculovirus     | Five               | vector                                          | 11900              | RNA         | acute                 | 52.00%             | enveloped       | non-segmented | low                     | no             | (6)      |
| Changuinola virus**                   | Reoviridae       | Orbivirus         | Three              | vector                                          | 19771              | RNA         | acute                 | 0.00%              | non-enveloped   | segmented     | high                    | no             | (7)      |
| Chapare virus**                       | Arenaviridae     | Arenavirus        | Five               | direct/indirect contact                         | 10464              | RNA         | acute                 | 30.00%             | enveloped       | segmented     | high                    | no             | (8)      |
| Chikungunya virus                     | Togaviridae      | Alphavirus        | Four               | vector                                          | 11826              | RNA         | acute                 | 0.03%              | enveloped       | non-segmented | high                    | yes            |          |
| Choclo virus                          | Bunyaviridae     | Hantavirus        | Five               | direct/indirect contact                         | 12195              | RNA         | acute                 | 0.00%              | enveloped       | segmented     | high                    | no             | (9)      |
| Colorado tick fever virus             | Reoviridae       | Coltivirus        | Three              | vector                                          | 18000              | RNA         | acute                 | 0.00%              | non-enveloped   | segmented     | high                    | no             |          |
| Cowpox virus                          | Poxviridae       | Orthopoxvirus     | One                | direct/indirect contact                         | 196858             | DNA         | acute                 | 0.00%              | enveloped       | non-segmented | high                    | no             |          |
| Coxsackie B3                          | Picornaviridae   | Enterovirus       | Four               | direct/indirect contact                         | 7400               | RNA         | acute                 | 5.00%              | non-enveloped   | non-segmented | high                    | yes            | (10)     |
| Coxsackievirus A16                    | Picornaviridae   | Enterovirus       | Four               | fecal-oral                                      | 7413               | RNA         | acute                 | 1.00%              | non-enveloped   | non-segmented | high                    | yes            |          |
| Crimean-Congo hemorrhagic fever virus | Bunyaviridae     | Nairovirus        | Five               | vector                                          | 19201              | RNA         | acute                 | 40.00%             | enveloped       | segmented     | high                    | yes            | (11)     |
| Dengue virus                          | Flaviviridae     | Flavivirus        | Four               | vector                                          | 10735              | RNA         | acute                 | 1.00%              | enveloped       | non-segmented | low                     | yes            |          |
| Dhori virus**                         | Orthomyxoviridae | Thogotovirus      | Five               | vector                                          | 11119              | RNA         | acute                 | 1.00%              | enveloped       | segmented     | high                    | no             |          |
| Dobrava-Belgrade virus                | Bunyaviridae     | Hantavirus        | Five               | direct/indirect contact                         | 11851              | RNA         | acute                 | 12.00%             | enveloped       | segmented     | high                    | no             | (12)     |
| Dugbe virus                           | Bunyaviridae     | Nairovirus        | Five               | vector                                          | 18859              | RNA         | acute                 | 20.00%             | enveloped       | segmented     | high                    | no             |          |
| Duvenhage virus**                     | Rhabdoviridae    | Lyssavirus        | Five               | animal bite                                     | 11977              | RNA         | acute                 | 100.00%            | enveloped       | non-segmented | low                     | no             | (13)     |
| Eastern equine encephalitis virus     | Togaviridae      | Alphavirus        | Four               | vector                                          | 11675              | RNA         | acute                 | 30.00%             | enveloped       | non-segmented | high                    | no             | (14)     |
| Ebola virus                           | Filoviridae      | Ebolavirus        | Five               | bodily fluids                                   | 18959              | RNA         | acute                 | 50.00%             | enveloped       | non-segmented | low                     | yes            | (15)     |
| Echovirus                             | Picornaviridae   | Enterovirus       | Four               | fecal-oral                                      | 7348               | RNA         | acute                 | 0.30%              | non-enveloped   | non-segmented | high                    | yes            |          |
| Encephalomyocarditis virus            | Picornaviridae   | Cardiovirus       | Four               | direct/indirect contact                         | 7800               | RNA         | acute                 | 0.00%              | non-enveloped   | non-segmented | high                    | no             | (16)     |
| Enterovirus A71                       | Picornaviridae   | Enterovirus       | Four               | direct/indirect contact                         | 7413               | RNA         | acute                 | 5.00%              | non-enveloped   | non-segmented | high                    | yes            | (17)     |

|                                     |                  |                     |       |                                                    |        |     |         |         |               |               |      |     |      |
|-------------------------------------|------------------|---------------------|-------|----------------------------------------------------|--------|-----|---------|---------|---------------|---------------|------|-----|------|
| Enterovirus D68                     | Picornaviridae   | Enterovirus         | Four  | direct/indirect contact; respiratory bodily fluids | 7390   | RNA | acute   | 1.00%   | non-enveloped | non-segmented | high | yes |      |
| Epstein-Barr virus                  | Herpesviridae    | Lymphocryptovirus   | One   |                                                    | 171823 | DNA | acute   | 0.00%   | enveloped     | non-segmented | high | yes |      |
| European bat lyssavirus             | Rhabdoviridae    | Lyssavirus          | Five  | animal bite                                        | 11966  | RNA | acute   | 100.00% | enveloped     | non-segmented | low  | no  | (18) |
| Everglades virus                    | Togaviridae      | Alphavirus          | Four  | vector                                             | 11395  | RNA | acute   | 0.00%   | enveloped     | non-segmented | high | no  |      |
| Granada virus                       | Bunyaviridae     | Phlebovirus         | Five  | vector                                             | 15000  | RNA | acute   | 0.00%   | enveloped     | segmented     | high | no  |      |
| Guanarito virus                     | Arenaviridae     | Arenavirus          | Five  | direct/indirect contact; respiratory vector        | 10424  | RNA | acute   | 30.00%  | enveloped     | segmented     | high | no  |      |
| Guaroa virus                        | Bunyaviridae     | Orthobunyavirus     | Five  |                                                    | 12239  | RNA | acute   | 0.00%   | enveloped     | segmented     | high | no  |      |
| Hantaan virus                       | Bunyaviridae     | Hantavirus          | Five  | direct/indirect contact                            | 11847  | RNA | acute   | 10.00%  | enveloped     | segmented     | high | no  |      |
| Heartland virus                     | Bunyaviridae     | Phlebovirus         | Five  | vector                                             | 11567  | RNA | acute   | 0.00%   | enveloped     | segmented     | high | no  |      |
| Hendra virus                        | Paramyxoviridae  | Henipavirus         | Five  | bodily fluids                                      | 18234  | RNA | acute   | 50.00%  | enveloped     | non-segmented | low  | no  | (19) |
| Hepatitis A virus                   | Picornaviridae   | Hepatovirus         | Four  | fecal-oral                                         | 7478   | RNA | acute   | 1.00%   | non-enveloped | non-segmented | high | yes |      |
| Hepatitis B virus                   | Hepadnaviridae   | Orthohepadnavirus   | Seven | blood; sexual                                      | 3215   | DNA | chronic | 0.40%   | enveloped     | non-segmented | high | yes |      |
| Hepatitis C virus                   | Flaviviridae     | Hepacivirus         | Four  | blood; sexual                                      | 9646   | RNA | chronic | 14.00%  | enveloped     | non-segmented | low  | yes | (20) |
| Hepatitis delta virus               | Deltavirus       | Deltavirus          | Five  | blood; sexual                                      | 1682   | RNA | chronic | 10.00%  | enveloped     | non-segmented | high | yes | (21) |
| Hepatitis E virus                   | Hepeviridae      | Hepevirus           | Four  | fecal-oral                                         | 7176   | RNA | acute   | 2.00%   | non-enveloped | non-segmented | high | yes |      |
| Herpes B                            | Herpesviridae    | Lymphocryptovirus   | One   | animal bite                                        | 150715 | DNA | acute   | 80.00%  | enveloped     | non-segmented | high | no  | (22) |
| Highlands J virus**                 | Togaviridae      | Alphavirus          | Four  | vector                                             | 11526  | RNA | acute   | 0.00%   | enveloped     | non-segmented | high | no  |      |
| Human adenovirus C                  | Adenoviridae     | Mastadenovirus      | One   | fecal-oral; respiratory                            | 35937  | DNA | chronic | 5.00%   | non-enveloped | non-segmented | high | yes |      |
| Human astrovirus                    | Astroviridae     | Avastrovirus        | Four  | fecal-oral                                         | 7003   | RNA | acute   | 0.00%   | non-enveloped | non-segmented | high | yes |      |
| Human bocavirus                     | Parvoviridae     | Bocaparvovirus      | Two   | direct/indirect contact; respiratory               | 5299   | DNA | acute   | 0.00%   | non-enveloped | non-segmented | high | yes |      |
| Human coronavirus 229E              | Coronaviridae    | Alphacoronavirus    | Four  | respiratory                                        | 27317  | RNA | acute   | 5.00%   | enveloped     | non-segmented | high | yes | (23) |
| Human coronavirus HKU1              | Coronaviridae    | Betacoronavirus     | Four  | respiratory                                        | 29,934 | RNA | acute   | 1.00%   | enveloped     | non-segmented | high | yes | (24) |
| Human coronavirus NL63              | Coronaviridae    | Betacoronavirus     | Four  | respiratory                                        | 27410  | RNA | acute   | 1.00%   | enveloped     | non-segmented | high | yes | (20) |
| Human coronavirus OC43              | Coronaviridae    | Betacoronavirus     | Four  | respiratory                                        | 30578  | RNA | acute   | 0.01%   | enveloped     | non-segmented | high | yes | (23) |
| Human cosavirus A                   | Picornaviridae   | Cosavirus           | Four  | fecal-oral                                         | 7632   | RNA | acute   | 0.00%   | non-enveloped | non-segmented | high | yes |      |
| Human cosavirus B                   | Picornaviridae   | Cosavirus           | Four  | fecal-oral                                         | 7205   | RNA | acute   | 0.00%   | non-enveloped | non-segmented | high | yes |      |
| Human cosavirus C                   | Picornaviridae   | Cosavirus           | Four  | fecal-oral                                         | 7200   | RNA | acute   | 0.00%   | non-enveloped | non-segmented | high | yes |      |
| Human cosavirus D                   | Picornaviridae   | Cosavirus           | Four  | fecal-oral                                         | 7215   | RNA | acute   | 0.00%   | non-enveloped | non-segmented | high | yes |      |
| Human cosavirus E1                  | Picornaviridae   | Cosavirus           | Four  | fecal-oral                                         | 6,580  | RNA | acute   | 0.00%   | non-enveloped | non-segmented | high | yes |      |
| Human cosavirus F                   | Picornaviridae   | Cosavirus           | Four  | fecal-oral                                         | 6656   | RNA | acute   | 0.00%   | non-enveloped | non-segmented | high | yes |      |
| Human cytomegalovirus               | Herpesviridae    | Cytomegalovirus     | One   | bodily fluids                                      | 229354 | DNA | chronic | 0.01%   | enveloped     | non-segmented | high | yes |      |
| Human herpesvirus 1                 | Herpesviridae    | Simplexvirus        | One   | bodily fluids; sexual                              | 152261 | DNA | chronic | 0.00%   | enveloped     | non-segmented | high | yes |      |
| Human herpesvirus 2                 | Herpesviridae    | Simplexvirus        | One   | sexual                                             | 117505 | DNA | chronic | 0.00%   | enveloped     | non-segmented | high | yes |      |
| Human herpesvirus 6A                | Herpesviridae    | Roseolovirus        | One   | direct/indirect contact; respiratory               | 159322 | DNA | chronic | 0.00%   | enveloped     | non-segmented | high | yes |      |
| Human herpesvirus 6B                | Herpesviridae    | Roseolovirus        | One   | direct/indirect contact; respiratory               | 162114 | DNA | chronic | 0.00%   | enveloped     | non-segmented | high | yes |      |
| Human herpesvirus 7                 | Herpesviridae    | Roseolovirus        | One   | direct/indirect contact                            | 153080 | DNA | chronic | 0.00%   | enveloped     | non-segmented | high | yes |      |
| Human herpesvirus 8                 | Herpesviridae    | Rhadinovirus        | One   | bodily fluids; sexual                              | 137969 | DNA | chronic | 2.50%   | enveloped     | non-segmented | high | yes |      |
| Human immunodeficiency virus type 1 | Retroviridae     | Lentivirus          | Six   | blood; sexual                                      | 9181   | RNA | chronic | 80.00%  | enveloped     | non-segmented | high | yes |      |
| Human immunodeficiency virus type 2 | Retroviridae     | Lentivirus          | Six   | blood; sexual                                      | 10271  | RNA | chronic | 20.00%  | enveloped     | non-segmented | high | yes | (25) |
| Human metapneumovirus               | Paramyxoviridae  | Metapneumovirus     | Five  | direct/indirect contact                            | 13251  | RNA | acute   | 0.01%   | enveloped     | non-segmented | low  | yes |      |
| Human papillomavirus 16             | Papillomaviridae | Alphapapillomavirus | One   | direct/indirect contact; sexual                    | 7906   | DNA | chronic | 0.50%   | non-enveloped | non-segmented | high | yes | (26) |
| Human papillomavirus 18             | Papillomaviridae | Alphapapillomavirus | One   | direct/indirect contact; sexual                    | 7843   | DNA | chronic | 0.50%   | non-enveloped | non-segmented | high | yes | (26) |
| Human papillomavirus 32             | Papillomaviridae | Alphapapillomavirus | One   | direct/indirect contact; sexual                    | 7961   | DNA | chronic | 0.01%   | non-enveloped | non-segmented | high | yes |      |
| Human papillomavirus 5              | Papillomaviridae | Betapapillomavirus  | One   | direct/indirect contact                            | 7757   | DNA | chronic | 0.01%   | non-enveloped | non-segmented | high | yes |      |
| Human papillomavirus 9              | Papillomaviridae | Betapapillomavirus  | One   | direct/indirect contact                            | 7400   | DNA | chronic | 0.01%   | non-enveloped | non-segmented | high | yes |      |
| Human parainfluenza virus 1         | Paramyxoviridae  | Respirovirus        | Five  | respiratory                                        | 15504  | RNA | acute   | 2.00%   | enveloped     | non-segmented | low  | yes | (27) |
| Human parainfluenza virus 2         | Paramyxoviridae  | Rubulavirus         | Five  | respiratory                                        | 15654  | RNA | acute   | 1.00%   | enveloped     | non-segmented | low  | yes |      |
| Human parainfluenza virus 3         | Paramyxoviridae  | Respirovirus        | Five  | respiratory                                        | 15405  | RNA | acute   | 2.00%   | enveloped     | non-segmented | low  | yes |      |

|                                    |                  |                   |       |                                      |        |     |         |         |               |               |      |     |      |
|------------------------------------|------------------|-------------------|-------|--------------------------------------|--------|-----|---------|---------|---------------|---------------|------|-----|------|
| Human parainfluenza virus 4        | Paramyxoviridae  | Rubulavirus       | Five  | respiratory                          | 17091  | RNA | acute   | 1.00%   | enveloped     | non-segmented | low  | yes |      |
| Human parainfluenza virus 5        | Paramyxoviridae  | Rubulavirus       | Five  | respiratory                          | 15246  | RNA | acute   | 0.00%   | enveloped     | non-segmented | low  | yes |      |
| Human parechovirus                 | Picornaviridae   | Parechovirus      | Four  | fecal-oral                           | 9392   | RNA | acute   | 5.00%   | non-enveloped | non-segmented | high | yes |      |
| Human parvovirus 4                 | Parvoviridae     | Parvovirus        | Two   | unknown                              | 5,268  | DNA | acute   | 0.00%   | non-enveloped | non-segmented | high | yes |      |
| Human parvovirus B19               | Parvoviridae     | Erythroparvovirus | Two   | respiratory                          | 5596   | DNA | acute   | 10.00%  | non-enveloped | non-segmented | high | yes | (28) |
| Human pegivirus                    | Flaviviridae     | Pegivirus         | Four  | blood; sexual                        | 9259   | RNA | chronic | 0.00%   | enveloped     | non-segmented | low  | yes |      |
| Human picobirnavirus               | Picobirnaviridae | Picobirnavirus    | Three | fecal-oral                           | 4000   | RNA | acute   | 0.00%   | non-enveloped | segmented     | high | yes |      |
| Human polyomavirus 10              | Polyomaviridae   | Polyomavirus      | One   | fecal-oral                           | 4939   | DNA | acute   | 0.00%   | non-enveloped | non-segmented | high | yes |      |
| Human polyomavirus 12              | Polyomaviridae   | Polyomavirus      | One   | fecal-oral                           | 5033   | DNA | acute   | 0.00%   | non-enveloped | non-segmented | high | yes |      |
| Human respiratory syncytial virus  | Paramyxoviridae  | Pneumovirus       | Five  | direct/indirect contact; respiratory | 15128  | RNA | acute   | 2.00%   | enveloped     | non-segmented | low  | yes |      |
| Human rhinovirus A                 | Picornaviridae   | Enterovirus       | Four  | respiratory                          | 7152   | RNA | acute   | 0.00%   | non-enveloped | non-segmented | high | yes |      |
| Human rhinovirus B                 | Picornaviridae   | Enterovirus       | Four  | respiratory                          | 6900   | RNA | acute   | 0.00%   | non-enveloped | non-segmented | high | yes |      |
| Human rhinovirus C                 | Picornaviridae   | Enterovirus       | Four  | respiratory                          | 7000   | RNA | acute   | 0.00%   | non-enveloped | non-segmented | high | yes |      |
| Human T-lymphotropic virus         | Retroviridae     | Deltaretrovirus   | Six   | blood; sexual                        | 8507   | RNA | chronic | 0.00%   | enveloped     | non-segmented | high | yes |      |
| Human torovirus                    | Coronaviridae    | Torovirus         | Four  | fecal-oral                           | 11161  | RNA | acute   | 0.00%   | enveloped     | non-segmented | high | yes |      |
| Ilheus virus**                     | Flaviviridae     | Flavivirus        | Four  | vector                               | 10759  | RNA | acute   | 0.00%   | enveloped     | non-segmented | low  | no  |      |
| Influenza A H3N2 virus             | Orthomyxoviridae | Influenzavirus A  | Five  | respiratory                          | 13588  | RNA | acute   | 0.10%   | enveloped     | segmented     | high | yes |      |
| Influenza A H5N1 virus             | Orthomyxoviridae | Influenzavirus A  | Five  | respiratory                          | 13500  | RNA | acute   | 60.00%  | enveloped     | segmented     | high | no  | (29) |
| Influenza A H7N9 virus             | Orthomyxoviridae | Influenzavirus A  | Five  | respiratory                          | 13500  | RNA | acute   | 20.00%  | enveloped     | segmented     | high | no  | (30) |
| Influenza B virus                  | Orthomyxoviridae | Influenzavirus B  | Five  | respiratory                          | 14548  | RNA | acute   | 0.10%   | enveloped     | segmented     | high | yes |      |
| Influenza C virus                  | Orthomyxoviridae | Influenzavirus C  | Five  | respiratory                          | 14600  | RNA | acute   | 0.00%   | enveloped     | segmented     | high | yes |      |
| Japanese encephalitis virus        | Flaviviridae     | Flavivirus        | Four  | vector                               | 10976  | RNA | acute   | 30.00%  | enveloped     | non-segmented | low  | no  | (31) |
| JC polyomavirus                    | Polyomaviridae   | Polyomavirus      | One   | fecal-oral                           | 5040   | DNA | chronic | 0.00%   | non-enveloped | non-segmented | high | yes |      |
| Junin virus                        | Arenaviridae     | Arenavirus        | Five  | direct/indirect contact              | 10524  | RNA | acute   | 25.00%  | enveloped     | segmented     | high | no  |      |
| Kairi virus**                      | Bunyaviridae     | Orthobunyavirus   | Five  | vector                               | 12000  | RNA | acute   | 0.00%   | enveloped     | segmented     | high | no  | (32) |
| KI polyomavirus                    | Polyomaviridae   | Polyomavirus      | One   | fecal-oral                           | 5229   | DNA | acute   | 0.00%   | non-enveloped | non-segmented | high | yes |      |
| Kokobera virus                     | Flaviviridae     | Flavivirus        | Four  | vector                               | 10874  | RNA | acute   | 0.00%   | enveloped     | non-segmented | low  | no  |      |
| Kyasanur forest disease virus      | Flaviviridae     | Flavivirus        | Four  | vector                               | 10694  | RNA | acute   | 5.00%   | enveloped     | non-segmented | low  | no  |      |
| Lake Victoria marburgvirus         | Filoviridae      | Marburgvirus      | Five  | bodily fluids                        | 19111  | RNA | acute   | 57.00%  | enveloped     | non-segmented | low  | no  |      |
| Langat virus**                     | Flaviviridae     | Flavivirus        | Four  | vector                               | 10943  | RNA | acute   | 0.00%   | enveloped     | non-segmented | low  | no  |      |
| Lassa virus                        | Arenaviridae     | Arenavirus        | Five  | direct/indirect contact; respiratory | 10824  | RNA | acute   | 1.00%   | enveloped     | segmented     | high | yes | (33) |
| Lordsdale virus                    | Caliciviridae    | Norovirus         | Four  | fecal-oral                           | 7555   | RNA | acute   | 0.00%   | non-enveloped | non-segmented | high | yes |      |
| Louping ill virus                  | Flaviviridae     | Flavivirus        | Four  | vector                               | 10871  | RNA | acute   | 15.00%  | enveloped     | non-segmented | low  | no  |      |
| Lujo virus**                       | Arenaviridae     | Arenavirus        | Five  | direct/indirect contact; respiratory | 10352  | RNA | acute   | 80.00%  | enveloped     | segmented     | high | yes | (34) |
| Lymphocytic choriomeningitis virus | Arenaviridae     | Arenavirus        | Five  | direct/indirect contact              | 10593  | RNA | acute   | 1.00%   | enveloped     | segmented     | high | no  |      |
| Machupo virus                      | Arenaviridae     | Arenavirus        | Five  | direct/indirect contact; respiratory | 10562  | RNA | acute   | 30.00%  | enveloped     | segmented     | high | yes | (35) |
| Mamastrovirus 1                    | Astroviridae     | Mamastrovirus     | Four  | fecal-oral                           | 6673   | RNA | acute   | 0.00%   | non-enveloped | non-segmented | high | yes |      |
| Mammalian orthoreovirus            | Reoviridae       | Orthoreovirus     | Three | fecal-oral; respiratory              | 18000  | RNA | acute   | 0.00%   | non-enveloped | segmented     | high | yes |      |
| Marituba virus                     | Bunyaviridae     | Orthobunyavirus   | Five  | vector                               | 12599  | RNA | acute   | 0.00%   | enveloped     | segmented     | high | no  |      |
| Mayaro virus                       | Togaviridae      | Alphavirus        | Four  | vector                               | 11411  | RNA | acute   | 0.00%   | enveloped     | non-segmented | high | no  |      |
| Measles virus                      | Paramyxoviridae  | Morbillivirus     | Five  | respiratory                          | 15894  | RNA | acute   | 0.10%   | enveloped     | non-segmented | low  | yes |      |
| Menangle virus**                   | Paramyxoviridae  | Rubulavirus       | Five  | direct/indirect contact              | 15516  | RNA | acute   | 0.00%   | enveloped     | non-segmented | low  | no  |      |
| Merkel cell polyomavirus           | Polyomaviridae   | Orthopolyomavirus | One   | unknown                              | 5400   | DNA | chronic | 0.01%   | non-enveloped | non-segmented | high | yes |      |
| Middle East respiratory syndrome   | Coronaviridae    | Betacoronavirus   | Four  | direct/indirect contact              | 30063  | RNA | acute   | 36.00%  | enveloped     | non-segmented | high | yes | (36) |
| Mokola virus**                     | Rhabdoviridae    | Lyssavirus        | Five  | animal bite                          | 11940  | RNA | acute   | 100.00% | enveloped     | non-segmented | low  | no  |      |
| Molluscum contagiosum virus 1      | Poxviridae       | Molluscipoxvirus  | One   | direct/indirect contact              | 190289 | DNA | chronic | 0.00%   | enveloped     | non-segmented | high | yes |      |
| Monkeypox virus                    | Poxviridae       | Orthopoxvirus     | One   | direct/indirect contact              | 194711 | DNA | acute   | 10.00%  | enveloped     | non-segmented | high | yes | (37) |
| Mumps virus                        | Paramyxoviridae  | Rubulavirus       | Five  | bodily fluids; respiratory           | 15384  | RNA | acute   | 1.00%   | enveloped     | non-segmented | low  | yes |      |
| Murray Valley encephalitis virus   | Flaviviridae     | Flavivirus        | Four  | vector                               | 11014  | RNA | acute   | 20.00%  | enveloped     | non-segmented | low  | no  | (38) |
| MX polyomavirus                    | Polyomaviridae   | Polyomavirus      | One   | fecal-oral                           | 5000   | DNA | acute   | 0.00%   | non-enveloped | non-segmented | high | yes |      |

|                                                   |                  |                  |       |                                         |        |     |         |         |               |               |      |     |      |
|---------------------------------------------------|------------------|------------------|-------|-----------------------------------------|--------|-----|---------|---------|---------------|---------------|------|-----|------|
| New York virus**                                  | Bunyaviridae     | Hantavirus       | Five  | direct/indirect contact                 | 12000  | RNA | acute   | 0.00%   | enveloped     | segmented     | high | no  |      |
| Newcastle disease virus                           | Paramyxoviridae  | Avulavirus       | Five  | direct/indirect contact                 | 15192  | RNA | acute   | 0.00%   | enveloped     | non-segmented | low  | no  |      |
| Nipah virus                                       | Paramyxoviridae  | Henipavirus      | Five  | animal bite;<br>direct/indirect contact | 18246  | RNA | acute   | 40.00%  | enveloped     | non-segmented | low  | yes | (39) |
| Norovirus                                         | Caliciviridae    | Norovirus        | Four  | fecal-oral                              | 7654   | RNA | acute   | 0.01%   | non-enveloped | non-segmented | high | yes |      |
| Ntaya virus                                       | Flaviviridae     | Flavivirus       | Four  | vector                                  | 10943  | RNA | acute   | 0.00%   | enveloped     | non-segmented | low  | no  | (40) |
| Nyando virus                                      | Bunyaviridae     | Orthobunyavirus  | Five  | vector                                  | 12375  | RNA | acute   | 0.00%   | enveloped     | segmented     | high | no  | (41) |
| O'nyong-nyong virus                               | Togaviridae      | Alphavirus       | Four  | vector                                  | 11835  | RNA | acute   | 0.00%   | enveloped     | non-segmented | high | yes |      |
| Omsk haemorrhagic fever virus                     | Flaviviridae     | Flavivirus       | Four  | vector                                  | 10694  | RNA | acute   | 2%      | enveloped     | non-segmented | low  | no  |      |
| Orf virus                                         | Poxviridae       | Parapoxvirus     | One   | direct/indirect contact                 | 139962 | DNA | acute   | 1.00%   | enveloped     | non-segmented | high | no  |      |
| Oropouche virus                                   | Bunyaviridae     | Orthobunyavirus  | Five  | vector                                  | 12183  | RNA | acute   | 0.00%   | enveloped     | segmented     | high | no  |      |
| Orungo virus                                      | Reoviridae       | Orbivirus        | Three | vector                                  | 18000  | RNA | acute   | 0.00%   | non-enveloped | segmented     | high | no  |      |
| Poliovirus                                        | Picornaviridae   | Enterovirus      | Four  | fecal-oral                              | 7440   | RNA | acute   | 0.90%   | non-enveloped | non-segmented | high | yes |      |
| Powassan virus                                    | Flaviviridae     | Flavivirus       | Four  | vector                                  | 10839  | RNA | acute   | 10.00%  | enveloped     | non-segmented | low  | no  |      |
| Puumala virus                                     | Bunyaviridae     | Hantavirus       | Five  | direct/indirect contact                 | 12058  | RNA | acute   | 1.00%   | enveloped     | segmented     | high | yes |      |
| Quaranfil virus                                   | Orthomyxoviridae | Quarantavirus    | Five  | vector                                  | 14000  | RNA | acute   | 0.00%   | enveloped     | segmented     | high | no  |      |
| Rabies virus                                      | Rhabdoviridae    | Lyssavirus       | Five  | animal bite                             | 11932  | RNA | acute   | 100.00% | enveloped     | non-segmented | low  | no  | (42) |
| Rift valley fever virus                           | Bunyaviridae     | Phlebovirus      | Five  | vector                                  | 11980  | RNA | acute   | 1.00%   | enveloped     | segmented     | high | no  |      |
| Rosavirus 2                                       | Picornaviridae   | Rosavirus        | Four  | direct/indirect contact                 | 8931   | RNA | acute   | 0.00%   | non-enveloped | non-segmented | high | no  | (43) |
| Ross river virus                                  | Togaviridae      | Alphavirus       | Four  | vector                                  | 11657  | RNA | acute   | 1.00%   | enveloped     | non-segmented | high | yes |      |
| Rotavirus A                                       | Reoviridae       | Rotavirus        | Three | fecal-oral                              | 18601  | RNA | acute   | 1.00%   | non-enveloped | segmented     | high | yes |      |
| Rotavirus B                                       | Reoviridae       | Rotavirus        | Three | fecal-oral                              | 18602  | RNA | acute   | 1.00%   | non-enveloped | segmented     | high | yes |      |
| Rotavirus C                                       | Reoviridae       | Rotavirus        | Three | fecal-oral                              | 17910  | RNA | acute   | 0.00%   | non-enveloped | segmented     | high | no  |      |
| Rubella virus                                     | Togaviridae      | Rubivirus        | Four  | respiratory                             | 15384  | RNA | acute   | 0.25%   | enveloped     | non-segmented | high | yes |      |
| Saaremaa virus                                    | Bunyaviridae     | Hantavirus       | Five  | direct/indirect contact                 | 12000  | RNA | acute   | 0.00%   | enveloped     | segmented     | high | no  |      |
| Sabia virus**                                     | Arenaviridae     | Arenavirus       | Five  | direct/indirect contact                 | 10499  | RNA | acute   | 30%     | enveloped     | segmented     | high | yes |      |
| Saffold virus                                     | Picornaviridae   | Cardiovirus      | Four  | direct/indirect contact                 | 8115   | RNA | acute   | 0.00%   | non-enveloped | non-segmented | high | no  |      |
| Sagiyama virus                                    | Togaviridae      | Alphavirus       | Four  | vector                                  | 11698  | RNA | acute   | 0.00%   | enveloped     | non-segmented | high | no  |      |
| Sandfly fever sicilian virus                      | Bunyaviridae     | Phlebovirus      | Five  | vector                                  | 11494  | RNA | acute   | 1.00%   | enveloped     | segmented     | high | no  |      |
| Sapporo virus                                     | Caliciviridae    | Sapovirus        | Four  | fecal-oral                              | 7521   | RNA | acute   | 0.00%   | non-enveloped | non-segmented | high | yes |      |
| SARS coronavirus                                  | Coronaviridae    | Betacoronavirus  | Four  | respiratory                             | 29751  | RNA | acute   | 11.00%  | enveloped     | non-segmented | high | yes | (44) |
| Semliki Forest virus                              | Togaviridae      | Alphavirus       | Four  | vector                                  | 11442  | RNA | acute   | 0.00%   | enveloped     | non-segmented | high | no  |      |
| Seoul virus                                       | Bunyaviridae     | Hantavirus       | Five  | direct/indirect contact                 | 11904  | RNA | acute   | 1.00%   | enveloped     | segmented     | high | no  |      |
| Severe fever with thrombocytopenia syndrome virus | Bunyaviridae     | Phlebovirus      | Five  | vector                                  | 11490  | RNA | acute   | 15.00%  | enveloped     | segmented     | high | no  |      |
| Simian foamy virus                                | Retroviridae     | Spumavirus       | Six   | direct/indirect contact                 | 11764  | RNA | chronic | 0.00%   | enveloped     | non-segmented | high | no  |      |
| Sin Nombre virus                                  | Bunyaviridae     | Hantavirus       | Five  | direct/indirect contact                 | 12318  | RNA | acute   | 35%     | enveloped     | segmented     | high | no  |      |
| Sindbis virus                                     | Togaviridae      | Alphavirus       | Four  | vector                                  | 11703  | RNA | acute   | 0.00%   | enveloped     | non-segmented | high | no  |      |
| St. Louis encephalitis virus                      | Flaviviridae     | Flavivirus       | Four  | vector                                  | 10940  | RNA | acute   | 20.00%  | enveloped     | non-segmented | low  | no  | (45) |
| STL polyomavirus                                  | Polyomaviridae   | Polyomavirus     | One   | fecal-oral                              | 5000   | DNA | acute   | 0.00%   | non-enveloped | non-segmented | high | yes |      |
| Syr-Darya Valley fever virus**                    | Picornaviridae   | Cardiovirus      | Four  | vector                                  | 7800   | RNA | acute   | 0.00%   | non-enveloped | non-segmented | high | no  |      |
| Tacaiuma virus**                                  | Bunyaviridae     | Orthobunyavirus  | Five  | vector                                  | 12000  | RNA | acute   | 0.00%   | enveloped     | segmented     | high | no  | (46) |
| Tanapox virus                                     | Poxviridae       | Yatapoxvirus     | One   | vector                                  | 144565 | DNA | acute   | 0.00%   | enveloped     | non-segmented | high | no  |      |
| Tembusu virus                                     | Flaviviridae     | Flavivirus       | Four  | vector                                  | 10990  | RNA | acute   | 0.00%   | enveloped     | non-segmented | low  | no  |      |
| Thogoto virus**                                   | Orthomyxoviridae | Thogotovirus**   | Five  | vector                                  | 14000  | RNA | acute   | 0.00%   | enveloped     | segmented     | high | no  |      |
| Tick-borne encephalitis virus                     | Flaviviridae     | Flavivirus       | Four  | vector                                  | 11141  | RNA | acute   | 5.00%   | enveloped     | non-segmented | low  | no  | (47) |
| Tonate virus                                      | Togaviridae      | Alphavirus       | Four  | vector                                  | 11000  | RNA | acute   | 1.00%   | enveloped     | non-segmented | high | no  |      |
| Torque teno virus 1                               | Anelloviridae    | Alphatorquevirus | Two   | blood; sexual                           | 3852   | DNA | chronic | 0.00%   | non-enveloped | non-segmented | high | yes |      |
| Toscana virus                                     | Bunyaviridae     | Phlebovirus      | Five  | vector                                  | 12488  | RNA | acute   | 1.00%   | enveloped     | segmented     | high | no  |      |
| Tula virus                                        | Bunyaviridae     | Hantavirus       | Five  | direct/indirect contact                 | 12066  | RNA | acute   | 0.00%   | enveloped     | segmented     | high | no  |      |
| Una virus**                                       | Togaviridae      | Alphavirus       | Four  | vector                                  | 11964  | RNA | acute   | 0.00%   | enveloped     | non-segmented | high | no  |      |
| Usutu virus**                                     | Flaviviridae     | Flavivirus       | Four  | vector                                  | 11064  | RNA | acute   | 0.00%   | enveloped     | non-segmented | low  | no  |      |
| Uukuniemi virus**                                 | Bunyaviridae     | Phlebovirus      | Five  | vector                                  | 15225  | RNA | acute   | 0.00%   | enveloped     | segmented     | high | no  |      |

|                                      |                |               |      |                            |        |     |       |        |               |               |      |     |      |
|--------------------------------------|----------------|---------------|------|----------------------------|--------|-----|-------|--------|---------------|---------------|------|-----|------|
| Variola major virus                  | Poxviridae     | Orthopoxvirus | One  | direct/indirect contact    | 186103 | DNA | acute | 30%    | enveloped     | non-segmented | high | yes |      |
| Venezuelan equine encephalitis virus | Togaviridae    | Alphavirus    | Four | vector                     | 11495  | RNA | acute | 4%     | enveloped     | non-segmented | high | no  |      |
| Vesicular stomatitis Alagoas virus   | Rhabdoviridae  | Vesiculovirus | Five | vector                     | 11900  | RNA | acute | 0.00%  | enveloped     | non-segmented | low  | no  |      |
| Vilyuisk human encephalitis virus    | Picornaviridae | Cardiovirus   | Four | direct/indirect contact    | 7800   | RNA | acute | 15.00% | non-enveloped | non-segmented | high | no  |      |
| Wesselsbron virus                    | Flaviviridae   | Flavivirus    | Four | vector                     | 10814  | RNA | acute | 0.00%  | enveloped     | non-segmented | low  | no  |      |
| West Nile virus                      | Flaviviridae   | Flavivirus    | Four | vector                     | 10962  | RNA | acute | 15.00% | enveloped     | non-segmented | low  | no  | (48) |
| Western equine encephalitis virus    | Togaviridae    | Alphavirus    | Four | vector                     | 11476  | RNA | acute | 4%     | enveloped     | non-segmented | high | no  |      |
| WU Polyomavirus                      | Polyomaviridae | Polyomavirus  | One  | respiratory; bodily fluids | 5228   | DNA | acute | 0.00%  | non-enveloped | non-segmented | high | yes |      |
| Yaba monkey tumor virus              | Poxviridae     | Yatapoxvirus  | One  | vector                     | 144565 | DNA | acute | 0.00%  | enveloped     | non-segmented | high | no  |      |
| Yellow fever virus                   | Flaviviridae   | Flavivirus    | Four | vector                     | 10862  | RNA | acute | 50.00% | enveloped     | non-segmented | low  | yes | (49) |
| Zika virus                           | Flaviviridae   | Flavivirus    | Four | vector; sexual             | 10794  | RNA | acute | 0.00%  | enveloped     | non-segmented | low  | yes |      |

\*\*Viruses for which there have been fewer than ten reported cases.

## REFERENCES

1. Goncalves MA (2005) Adeno-associated virus: from defective virus to effective vector. *Virology Journal* 2:43.
2. Machado AM, Machado ARSR, Moreli ML, Ribeiro BM, Figueiredo LTM, *et al.* (2011) Expression of recombinant Araraquara hantavirus nucleoprotein in insect cells and its use as an antigen for immunodetection compared to the same antigen expressed in *Escherichia coli*. *Virology Journal* 8.
3. NSWHealth (2015) Australian bat lyssavirus fact sheet (<http://www.health.nsw.gov.au/infectious/factsheets/pages/rabies-australian-bat-lyssavirus-infection.aspx>).
4. Bondre VP, Sapkal GN, Yergolkar PN, Fulmali PV, Sankararaman V, *et al.* (2009) Genetic characterization of Bagaza virus (BAGV) isolated in India and evidence of anti-BAGV antibodies in sera collected from encephalitis patients. *Journal of General Virology* 90(Pt 11):2644-2649.
5. Grard G, Fair JN, Lee D, Slikas E, Steffen I, *et al.* (2012) A novel rhabdovirus associated with acute hemorrhagic fever in central Africa. *PLoS Pathogens* 8(9):e1002924.
6. Ghosh S, Dutta K, Basu A (2013) Chandipura virus induces neuronal death through Fas-mediated extrinsic apoptotic pathway. *Journal of Virology* 87(22):12398-12406.
7. Silva SP, Dilcher M, Weidmann M, Carvalho VL, Casseb AR, *et al.* (2013) Changuinola virus serogroup, new genomes within the genus Orbivirus (Family Reoviridae) isolated in the Brazilian Amazon region. *Genome Announcements* 1(6).
8. Delgado S, Erickson BR, Agudo R, Blair PJ, Vallejo E, *et al.* (2008) Chapare virus, a newly discovered arenavirus isolated from a fatal hemorrhagic fever case in Bolivia. *PLoS Pathogens* 4(4):e1000047.

9. Bayard V, Kitsutani PT, Barria EO, Ruedas LA, Tinnin DS, *et al.* (2004) Outbreak of hantavirus pulmonary syndrome, Los Santos, Panama, 1999-2000. *Emerging Infectious Diseases* 10(9):1635-1642.
10. Maze SS, Adolph RJ (1990) Myocarditis: unresolved issues in diagnosis and treatment. *Clinical Cardiology* 13(2):69-79.
11. WHO (2015) Crimean-Congo haemorrhagic fever fact sheet (<http://www.who.int/mediacentre/factsheets/fs208/en/>).
12. Papa A (2012) Dobrava-Belgrade virus: phylogeny, epidemiology, disease. *Antiviral Research* 95(2):104-117.
13. Koraka P, Martina BEE, Roose JM, van Thiel P-PAM, van Amerongen G, *et al.* (2012) *In vitro* and *in vivo* isolation and characterization of Duvenhage virus. *PLoS Pathogens* 8(5):e1002682.
14. CDC (2015) Eastern equine encephalitis fact sheet (<http://www.cdc.gov/EasternEquineEncephalitis/tech/factSheet.html>).
15. WHO (2015) Ebola virus disease fact sheet (<http://www.who.int/mediacentre/factsheets/fs103/en/>).
16. Carocci M, Bakkali-Kassimi L (2012) The encephalomyocarditis virus. *Virulence* 3(4):351-367.
17. Yip CCY, Lau SKP, Woo PCY, Yuen K-Y (2013) Human enterovirus 71 epidemics: what's next? *Emerging Health Threats Journal* 6:10.3402/ehtj.v3406i3400.19780.
18. DOH (2013) Rabies virus and other lyssavirus (including Australian bat lyssavirus) exposures and infections (<http://www.health.gov.au/internet/main/publishing.nsf/Content/cdna-song-abvl-rabies.htm>).
19. VICHealth (2015) Infectious diseases epidemiology and surveillance: hendra and nipah viruses (<http://ideas.health.vic.gov.au/bluebook/hendra.asp>).
20. Oosterhof L, Christensen CB, Sengelov H (2010) Fatal lower respiratory tract disease with human corona virus NL63 in an adult haematopoietic cell transplant recipient. *Bone Marrow Transplantation* 45(6):1115-1116.
21. WHO (2015) Global alert and response: hepatitis D (<http://www.who.int/csr/disease/hepatitis/whocdscsrncs20011/en/index3.html>).
22. Arvin A, Campadelli-Fiume G, Mocarski E, Moore PS, Roizman B, *et al.* (2007) *Human herpesviruses: biology, therapy, and immunoprophylaxis* (Cambridge University Press, Cambridge).
23. Pene F, Merlat A, Vabret A, Rozenberg F, Buzyn A, *et al.* (2003) Coronavirus 229E-related pneumonia in immunocompromised patients. *Clinical Infectious Diseases* 37(7):929-932.
24. Sloots TP, McErlean P, Speicher DJ, Arden KE, Nissen MD, *et al.* (2006) Evidence of human coronavirus HKU1 and human bocavirus in Australian children. *Journal of Clinical Virology* 35(1):99-102.

25. Grassly NC, Xiang Z, Ariyoshi K, Aaby P, Jensen H, *et al.* (1998) Mortality among human immunodeficiency virus type 2-positive villagers in rural Guinea-Bissau is correlated with viral genotype. *Journal of Virology* 72(10):7895-7899.
26. WHO (2015) Human papillomavirus (HPV) and cervical cancer fact sheet (<http://www.who.int/mediacentre/factsheets/fs380/en/>).
27. Henrickson KJ (2003) Parainfluenza viruses. *Clinical Microbiology Reviews* 16(2):242-264.
28. CDC (2015) Current trends risks associated with human parvovirus B19 infection (<http://www.cdc.gov/mmwr/preview/mmwrhtml/00001348.htm>).
29. WHO (2015) H5N1 influenza FAQs ([http://www.who.int/influenza/human\\_animal\\_interface/avian\\_influenza/h5n1\\_research/faqs/en/](http://www.who.int/influenza/human_animal_interface/avian_influenza/h5n1_research/faqs/en/)).
30. CDC (2013) Avian influenza A(H7N9) virus infections, Shanghai, China ([http://wwwnc.cdc.gov/eid/article/19/7/13-0523\\_article](http://wwwnc.cdc.gov/eid/article/19/7/13-0523_article)).
31. CDC (2012) Japanese encephalitis surveillance and immunization - Asia and the Western Pacific (<http://www.cdc.gov/mmwr/preview/mmwrhtml/mm6233a2.htm>).
32. Tauro LB, Almeida FL, Contigiani MS (2009) First detection of human infection by Cache Valley and Kairi viruses (Orthobunyavirus) in Argentina. *Transactions of the Royal Society of Tropical Medicine and Hygiene* 103(2):197-199.
33. CDC (2015) Lassa fever fact sheet ([http://www.cdc.gov/ncidod/dvrd/spb/mnpages/dispages/Fact\\_Sheets/Lassa\\_Fever\\_Fact\\_Sheet.pdf](http://www.cdc.gov/ncidod/dvrd/spb/mnpages/dispages/Fact_Sheets/Lassa_Fever_Fact_Sheet.pdf)).
34. Paweska JT, Sewlall NH, Ksiazek TG, Blumberg LH, Hale MJ, *et al.* (2009) Nosocomial outbreak of novel arenavirus infection, southern Africa. *Emerging Infectious Diseases* 15(10):1598-1602.
35. CDC (1994) International notes Bolivian hemorrhagic fever (<http://www.cdc.gov/mmwr/preview/mmwrhtml/00035133.htm>).
36. WHO (2015) Middle East respiratory syndrome coronavirus fact sheet (<http://www.who.int/mediacentre/factsheets/mers-cov/en/>).
37. Yvan JFH, Williams RJ, Philippe M, Richard P, Vladimir NL, *et al.* (2001) Outbreak of human monkeypox, Democratic Republic of Congo, 1996 to 1997. *Emerging Infectious Disease* 7(3):434.
38. Knox J, Cowan RU, Doyle JS, Ligtermoet MK, Archer JS, *et al.* (2012) Murray Valley encephalitis: a review of clinical features, diagnosis and treatment. *Medical Journal of Australia* 196(5):322-326.
39. Gurley ES, Montgomery JM, Hossain MJ, Bell M, Azad AK, *et al.* (2007) Person-to-person transmission of Nipah virus in a Bangladeshi community. *Emerging Infectious Diseases* 13(7):1031-1037.
40. Berger S (2015) *Infectious diseases of the world* (GIDEON Informatics).

41. Groseth A, Mampilli V, Weisend C, Dahlstrom E, Porcella SF, *et al.* (2014) Molecular characterization of human pathogenic Bunyaviruses of the Nyando and Bwamba/Pongola virus groups leads to the genetic identification of Mojuí dos Campos and Kaeng Khoi virus. *PLoS Neglected Tropical Diseases* 8(9):e3147.
42. WHO (2015) Rabies fact sheet (<http://www.who.int/mediacentre/factsheets/fs099/en/>).
43. Lim ES, Cao S, Holtz LR, Antonio M, Stine OC, *et al.* (2014) Discovery of rosavirus 2, a novel variant of a rodent-associated picornavirus, in children from The Gambia. *Virology* 454-455:25-33.
44. NIH (2015) Severe acute respiratory syndromefact sheet (<http://www.nlm.nih.gov/medlineplus/ency/article/007192.htm>).
45. CDC (2015) Saint Louis encephalitis fact sheet (<http://www.cdc.gov/sle/technical/fact.html>).
46. Beran GW (1994) *Handbook of zoonoses, second edition: viral zoonoses* (CRC Press).
47. CDC (2015) Tick-borne encephalitis fact sheet (<http://www.cdc.gov/vhf/tbe/resources/TBE-FactSheet.pdf>).
48. Petersen LR, Marfin AA (2002) West Nile virus: a primer for the clinician. *Ann Intern Med* 137(3):173-179.
49. WHO (2015) Emergencies preparedness, response: yellow fever (<http://www.who.int/csr/disease/yellowfev/en/>).
